# Supplementary material for: Biomarker Profiling by Nuclear Magnetic Resonance Spectroscopy for the Prediction of All-Cause Mortality: An Observational Study of 17,345 Persons
Source: PubMed Central journal article supplement (PMC3934819; doi:10.1371/journal.pmed.1001606), 2014-02-25
Supplement: pmed.1001606.s008.pdf [file pmed.1001606.s008.pdf]

**Table S3. Hazard ratios for all-cause mortality in the Estonian Biobank cohort stratified by gender.**

| <b>Biomarker</b>          | <b>Men</b>                             | <b>Women</b>                           |
|---------------------------|----------------------------------------|----------------------------------------|
|                           | <b>Hazard ratio (95% CI); P</b>        | <b>Hazard ratio (95% CI); P</b>        |
| Alpha-1-acid glycoprotein | 1.62 (1.44-1.82) P=9×10 <sup>-16</sup> | 1.77 (1.54-2.04) P=9×10 <sup>-16</sup> |
| Albumin                   | 0.67 (0.60-0.74) P=3×10 <sup>-13</sup> | 0.73 (0.64-0.83) P=4×10 <sup>-6</sup>  |
| VLDL particle size        | 0.64 (0.56-0.73) P=2×10 <sup>-10</sup> | 0.67 (0.56-0.79) P=3×10 <sup>-6</sup>  |
| Citrate                   | 1.53 (1.33-1.76) P=2×10 <sup>-9</sup>  | 1.21 (1.06-1.38) P=0.004               |

Hazard ratios (95% confidence intervals) are per 1-SD increment in biomarker concentration, and adjusted for age as time-scale, HDL cholesterol, current smoking, prevalent diabetes, prevalent cardiovascular disease, and prevalent cancer.
